# A focus on details? Inconsistent results on auditory and visual local-to-global processing in absolute pitch musicians

1 **Wenhart, T.**<sup>1,2</sup>, **Altenmüller, E.**<sup>1,2\*</sup>

2 <sup>1</sup> Institute of Music Physiology and Musicians' Medicine, University for Music, Drama and Media,  
3 Hannover, Germany

4 <sup>2</sup> Center for Systems Neuroscience, Hannover, Germany

5 **\* Correspondence:**

6 Prof. Dr. med. E. Altenmüller

7 eckart.altenmueller@hmtm-hannover.de

8 **Keywords: absolute pitch, cognitive style, weak central coherence, autistic traits, musicians**

9 **Abstract**

10 Absolute pitch, the ability to name or produce a musical tone without a reference, is a rare ability  
11 which is often related to early musical training and genetic components. However, it remains a matter  
12 of debate why absolute pitch is relatively common in autism spectrum disorders and why absolute  
13 pitch possessors exhibit higher autistic traits. By definition absolute pitch (which involves the  
14 analysis of single tones) is characterized by a focus on a local scale than relative pitch (involving  
15 relations between tones, intervals, melodies).

16 This study investigated whether a detail-oriented cognitive style, a concept borrowed from the autism  
17 literature (weak central coherence theory), might provide a framework to explain this joint  
18 occurrence. Two local-to-global experiments in vision (hierarchically constructed letters) and  
19 audition (hierarchically constructed melodies) as well as a pitch adjustment test measuring absolute  
20 pitch proficiency were conducted in 31 absolute pitch and 33 relative pitch professional musicians.  
21 Analyses revealed inconsistent group differences among reaction time, accuracy and speed-accuracy-  
22 composite-scores of experimental conditions (local vs. global, and congruent vs. incongruent  
23 stimuli). Furthermore, amounts of interference of global form on judgements of local elements and  
24 vice versa were calculated. Interestingly, reduced global-to-local interference in audition was  
25 associated with greater absolute pitch ability and in vision with higher autistic traits. Results are  
26 partially in line with the idea of a detail-oriented cognitive style in absolute pitch musicians. The  
27 inconsistency of the results might be due to limitations of global-to-local paradigms in measuring  
28 cognitive style and due to heterogeneity of absolute pitch possessors. In summary, this study provides  
29 further evidence for a multifaceted pattern of various and potentially interacting factors on the  
30 acquisition of absolute pitch.

31

32 **1 Introduction**

33 Absolute pitch, the ability to name or produce a musical tone without any reference (Takeuchi &  
34 Hulse, 1993; Ward, 1999), has frequently been associated with autism (e.g. Bonnel et al., 2003;  
35 Heaton, Hermelin, & Pring, 1998; for a review see Mottron et al., 2012) and autistic traits (Brown et

36 al., 2003; Dohn, Garza-Villarreal, Heaton, & Vuust, 2012). Ever since the association was first  
37 observed, a potential common framework for both phenomena and possible reasons for their joint  
38 occurrence have been matters of debate. Absolute pitch is a rare condition (<1% in the general  
39 population, Profita, Bidder, Optiz, & Reynolds, 1988) with a much higher incidence in professional  
40 musicians (up to 23%, Deutsch, Henthorn, Marvin, & Xu, 2006; Peter K. Gregersen, Kowalsky,  
41 Kohn, & Marvin, 1999, 2001) and people with autism spectrum disorder (e.g. Heaton et al., 1998;  
42 Heaton, Williams, Cummins, & Happé, 2008; for a review see Mottron et al., 2012). The latter is  
43 defined as a neurodevelopmental condition characterized by difficulties in social verbal and non-  
44 verbal communication, and by repetitive behaviors, restricted interests and sensory hyper- or  
45 hyposensitivities (Lai, Lombardo, Chakrabarti, & Baron-Cohen, 2013). Several authors have tried to  
46 explain absolute pitch with respect to autistic symptoms using theoretical concepts that describe a  
47 cognitive style with a tendency towards details. In autism literature, the weak central coherence  
48 account (Happé, 1999; Happé & Frith, 2006), the enhanced-perceptual functioning theory  
49 (Mottron, Dawson, & Soulières, 2009; Laurent Mottron, Dawson, Soulières, Hubert, & Burack,  
50 2006), empathizing-systemizing-theory (Baron-Cohen, 2005; Baron-Cohen, 2009) and the theory of  
51 veridical mapping (Mottron et al., 2012) are important frameworks, that include the concept of a  
52 detail-focused cognitive style. At the same time, Chin (2003) has proposed that absolute pitch  
53 musicians may also share a tendency to focus on details, and that this may be associated with an early  
54 start in musical training before the age of seven. Chin (2003) argues that the more detailed view of  
55 the world that children exhibit up to the age of six (Poirel, Mellet, Houdé, & Pineau, 2008; Poirel et  
56 al., 2011) leads to absolute pitch often only developing (or being maintained) during that period. In  
57 general, absolute pitch seems to be an excellent model to investigate the interaction of genetic and  
58 environmental influences on the acquisition and development of expert abilities (Zatorre, 2003). A  
59 large body of research exists on the heritability of absolute pitch (Athos et al., 2007; Baharloo,  
60 Johnston, Service, Gitschier, & Freimer, 1998; Peter K. Gregersen et al., 1999), the importance of  
61 early musical training and sensitive periods (Deutsch et al., 2006; Peter K. Gregersen et al., 2001;  
62 Russo, Windell, & Cuddy, 2003; Schellenberg & Trehub, 2003) and neurophysiological and  
63 neuroanatomical differences related to absolute pitch (for a review see Bermudez & Zatorre, 2009;  
64 Zatorre, 2003). While some of the neuroscientific results have been discussed against the background  
65 of a possible relation between absolute pitch and autism (Dohn, Garza-Villarreal, Chakravarty,  
66 Hansen, Lerch & Vuust, 2015; Jäncke, Langer & Hänggi, 2012; Loui, Li, Hohmann & Schlaug,  
67 2011; Loui, Zamm & Schlaug, 2012a), cognitive style (in the sense of a focus on details) in absolute  
68 pitch musicians - as compared to the weak-perceptual-coherence account of autism - has never been  
69 investigated before.

70 Typically, paradigms to investigate detail vs. context-based cognition in autism follow the approach  
71 of the classical psychophysical experiments by Navon (1977) and consist of hierarchically organized  
72 visual (see e.g. Bölte, Holtmann, Poustka, Scheurich, & Schmidt, 2007; Happé, 1999; Happé & Frith,  
73 2006; Mottron, Burack, Iarocci, Belleville, & Enns, 2003) or auditory (e.g. Bouvet, Simard-Meilleur,  
74 Paignon, Mottron, & Donnadieu, 2014; Foxtan et al., 2003; Justus & List, 2005; List, Justus,  
75 Robertson, & Bentin, 2007; Mottron, Peretz, & Menard, 2000) stimuli, e.g. a global letter shape  
76 consisting of small letters of either the same or another letter. A range of prior studies have provided  
77 evidence for a detail-oriented cognitive style in autistic people in vision (e.g. Bölte et al., 2007; Grice  
78 et al., 2001; Mottron et al., 2003; Pring, Ryder, Crane, & Hermelin, 2010; Russell-Smith, Maybery,  
79 Bayliss, & Sng, 2012). Recently, Bouvet et al. (2011) developed a paradigm to parallel the  
80 experiment in audition. Subjects had to rate the direction of short hierarchically-constructed  
81 melodies, where either the whole melody or parts of it were rising or falling. Again, people with  
82 autism spectrum disorders showed a detailed-oriented style in this auditory experiment on cognitive  
83 style (Bouvet et al., 2014).

84 If people with autism exhibit a more detail-oriented cognitive style, not only in vision but also in  
85 audition, this could be a possible reason for the high frequency of absolute pitch in autistic people, as  
86 absolute pitch – by definition - requires focus on a lower-level perceptual entity (single tones), while  
87 relative pitch has a broader attentional focus (intervals and melodies, i.e. relation between two or  
88 more pitches). However, it is unclear whether healthy absolute pitch possessors show a similar focus  
89 on details in vision and or audition, which could explain higher scores on autism self-rating scales.  
90 Prior studies have only investigated visuo-spatial abilities (Costa-Giomi, Gilmour, Siddell, &  
91 Lefebvre, 2006) and auditory digit span in AP (Deutsch & Dooley, 2013) as well as the relation  
92 between relative and absolute pitch abilities in the same subjects (Ziv & Radin, 2014).

93 To our knowledge, this is the first study to investigate cognitive style in professional musicians with  
94 absolute vs. relative pitch, and its relation to accuracy of AP and autistic traits within the same  
95 sample. This study will therefore shed new light on the debate on why absolute pitch and autism are  
96 frequently associated and whether cognitive style could be their common framework.

97

## 98 **2 Methods**

### 99 **2.1 Setting**

100 The study was part of a larger project consisting of several experiments at the Institute of Music  
101 Physiology and Musicians Medicine of the University for Music, Drama and Media, Hannover. Two  
102 further experiments and EEG recordings were conducted within the same two sessions in the lab and  
103 are reported elsewhere (Wenhardt, Bethlehem, Baron-Cohen & Altenmüller, *under review*). For this  
104 reason, pitch adjustment assessment as well as cognitive tests from previous publications were also  
105 used as control variables here. Therefore, all subjects participated in three parts: an online survey and  
106 two appointments in the lab. The online survey was used for pitch identification screening and  
107 diagnostic as well as demographic questionnaires (see below). General intelligence tests, a musical  
108 ability test, a pitch adjustment test (Anders Dohn, Garza-Villarreal, Ribe, Wallentin, & Vuust, 2014)  
109 and two experiments assessing local-to-global processing both in vision and audition were conducted  
110 in the lab (see Table 1).

### 111 **2.2 Participants**

112 In total, 31 AP musicians (16 female) and 33 RP musicians (15 female) participated in the study. The  
113 above-mentioned online survey (UNIPARK software, <https://www.unipark.com/>) was used to recruit  
114 participants. They primarily were students or professional musicians at the University for Music,  
115 Drama and Media, Hanover; four AP and two RP were amateur musicians. As part of the online  
116 survey, a pitch identification screening test (PIS), consisting of 36 categorical, equal-tempered sine  
117 tones over a three octave range between C4 (261.63 Hz) and B6 (1975.5 Hz) was used to allocate the  
118 participants to groups (AP: >12/36 tones named correctly, else RP). Non-native German speakers had  
119 the choice between a German and an English version of the experiments (four AP subjects). All  
120 participants but one reported no regular medication or drug intake. None of the participants reported  
121 any history of severe psychiatric or neurological condition. The AP group consisted of 15 pianists, 9  
122 string players, 3 woodwind instrumentalists, two singers and 2 brass players; the RP group consisted  
123 of 13 pianists, 4 string players, 6 woodwind instrumentalists, 3 bassists/guitarists/accordionists, 3  
124 singers, one drummer and 3 brass players. The Edinburgh Handedness Inventory (Oldfield, 1971)  
125 was used to assess handedness. Apart from one subject all AP were consistently right handed,

126 whereas three RP were left-handed and two RP ambidextrous. This study was approved by the local  
127 Ethics Committee at the Medical University Hannover. All participants gave written consent.

128 Two standardized tests were used to assess general nonverbal intelligence and information processing  
129 speed: Raven’s Standard Progressive Matrices (Raven, Raven, & Court, 2004) and  
130 “Zahlenverbindungstest“(ZVT; Oswald, 2016). AMMA (Advanced Measures of Music Audiation;  
131 Gordon, 1989), Musical-Sophistication Index (GOLD-MSI; Müllensiefen, Gingras, Musil, &  
132 Stewart, 2014) and estimated total hours of musical training within life span (internal online  
133 questionnaire) served to control for musical ability and musical experience.

## 134 **2.3 Experiments and material**

### 135 **2.3.1 Pitch adjustment test (PAT)**

136 All participants performed two absolute pitch tests to assign them to groups AP or RP (pitch  
137 identification screening, online) and to assess the accuracy of absolute pitch under controlled  
138 conditions (pitch adjustment test, lab). During the pitch adjustment test (PAT; Dohn et al., 2014)  
139 participants have to adjust the frequency of a sine wave with random start frequency (220 - 880 Hz,  
140 1Hz steps) and try to hit a target musical note (letter presented centrally on PC screen, e.g. “F# / Gb”)  
141 as precisely as possible without the use of any kind of reference. Tones were presented through  
142 sound-isolating Shure 2-Way-In-ear Stereo Earphones (Shure SE425-CL, Shure Distribution GmbH,  
143 Eppingen, Germany) and participants were allowed to choose their octave of preference. The full test  
144 consisted of 108 target notes, presented in semi-random order in 3 blocks of 36 notes each (3\*12  
145 different notes per block) with breaks between the blocks. Online pitch modulation was provided by  
146 rotating a USB-Controller (Griffin PowerMate NA16029, Griffin Technology, 6001 Oak Canyon,  
147 Irvine, CA, USA). Participants could flexibly switch between rough and fine tuning by either turning  
148 the wheel (10 cent resolution) or by pressing it down while turning (1 cent resolution). Subjects were  
149 given a maximum of 15 seconds for each trial and could confirm their answer by pressing a button on  
150 a Cedrus Response Pad (Response Pad RB-844, Cedrus Corporation, San Pedro, CA 90734, USA) to  
151 automatically proceed with the next trial. The final frequency at the time of the button press or at the  
152 end of the maximum time given was recorded. In both cases, the Inter Trial Interval (ITI) was set to  
153 3000 ms. EEG was measured during the PAT but will be reported elsewhere. The final/selected  
154 frequencies in each trial were compared to the nearest target tone (< 6 semitones/600cent). The mean  
155 absolute deviation (MAD (1), (Anders Dohn et al., 2014)) from the target tone is given as:

$$156 \quad (1) \quad MAD = \frac{\sum_{i=1}^{N_{adjustment}} |c_i|}{N_{adjustment}},$$

157 This reflects the pitch adjustment accuracy of the participants and is calculated as the average of the  
158 absolute deviations  $c_i$  of the final/selected frequencies from the target tone (referenced to a 440 Hz  
159 equal tempered tuning). The consistency of the pitch adjustments (SDfoM, Standard deviation from  
160 own mean), possibly reflecting the tuning of the pitch template (Dohn et al., 2014), is then estimated  
161 by taking the standard deviation of the absolute deviations (2).

$$163 \quad (2) \quad SDfoM = \sqrt{\frac{\sum_{i=1}^{N_{adjustment}} |c_i|}{N_{adjustment} - 1}}$$

164 Z-standardization of the MAD ( $Z\_MAD$ , formula (3)) and SDfoM ( $Z\_SDfoM$ , formula (4)) values  
165 relative to the mean and standard deviation of the non-AP-group were performed for statistical  
166 analyses, as originally proposed by Dohn et al. (Anders Dohn et al., 2014).

167

$$168 \quad (3) \quad Z\_MAD_i = \frac{MAD_i - \mu(MAD)_{Non-AP}}{\sigma(MAD)_{Non-AP}}$$

169

$$170 \quad (4) \quad Z\_SDfoM_i = \frac{SDfoM_i - \mu(SDfoM)_{Non-AP}}{\sigma(SDfoM)_{Non-AP}}$$

### 171 **2.3.2 Autistic traits**

172 The Adult Autism Spectrum Quotient (AQ, (Baron-Cohen et al., 2001); German version by C.M.  
173 Freiburg, available online: [https://www.autismresearchcentre.com/arc\\_tests](https://www.autismresearchcentre.com/arc_tests)) was used to measure  
174 autistic traits. The questionnaire was presented within the online survey and consists of 50 items  
175 within five subscales (attention to detail, attention switching, imagination, social skills and  
176 communication). Items (half of them negatively poled) corresponding to either a mild or strong  
177 agreement with the autistic-like symptoms are given one point. The maximum AQ-Score therefore is  
178 50).

### 179 **2.3.3 Auditory global-local test (AGLT)**

180 Hierarchical melodies were constructed according to Bouvet et al. (2014). Melodies consisted of 9  
181 tones in groups of three (triplets), lasted for 1900ms (210 ms per note) and were presented through  
182 sound isolating Shure 2-Way In-ear Stereo Earphones (Shure SE425-CL, Shure Distribution GmbH,  
183 Eppingen, Germany). Melodies either successively ascended or descended in steps of two semitones,  
184 or the triplets ascended/descended and the next triplet started 6 semitones below respectively above  
185 the start of the prior triplet (see Figure 1 (a)). Subjects were asked to judge either the direction of the  
186 melody as a whole, or the direction of the triplets in two different blocks of 80 trials each. Compared  
187 to Bouvet et al. (2014) we transposed the melodies to 11 different tonalities to avoid that subjects  
188 could use absolute pitch cues for the task. One of the transpositions (4 trials, one of each condition)  
189 was taken for practice at the beginning of each block. The order of blocks (local vs. global condition)  
190 was randomized across subjects and groups. A break was given after the first half (40 trials) of each  
191 block. Subjects' responses were recorded via the Cedrus Response Pad (Response Pad RB-844,  
192 Cedrus Corporation, San Pedro, CA 90734, USA), with a right button press for ascending and a left  
193 button press for descending. Button colors were randomized across subjects and groups. Reaction  
194 times (RT) were calculated relative to the first tone, when a decision at the local respectively global  
195 level could be made (local: 2nd note, 210ms; global: 4th note, 630ms) to make reaction times  
196 between conditions comparable. During each trial, the word "attention" (German: "Achtung!") was  
197 presented for 1000ms at the center of the screen followed by the sound of the melody (1900ms).  
198 Responses were allowed for a further 3100ms after the end of the melody. After this time, or if a  
199 button press had occurred, the next trial followed after an ISI of 1000ms.

200 A total of nine participants (4 RP, 5 AP) had to be excluded. They either misunderstood the  
201 experiment (N=4) or were identified as outliers during inspection of RT distributions (see below)  
202 across and within conditions (N=5).

### 203 **2.3.4 Hierarchical letters (HL)**

204 Four different hierarchical letters were constructed according to Navon (1977). The stimuli were  
205 either a global “H” or a global “S” each consisting either of small “H” or small “S” (see Figure 1 (b)).  
206 Participants were asked to press a blue button for “H” and a yellow button for “S” or vice versa,  
207 depending on randomized allocation of the participants to the two experimental conditions (via the  
208 Cedrus Response Pad RB-844, Cedrus Corporation, San Pedro, CA 90734, USA). All participants  
209 underwent two blocks of 80 trials each (20 for each stimulus condition). In one block, they were  
210 asked to press the two buttons according to the global level of the stimuli, in the other block  
211 according to the local level. The order of blocks was randomized across subjects, with half of AP and  
212 half of RP starting with the local, respectively global block. Each block had a self-timed break after  
213 trial 40.. At the beginning of each block, four trials (one per condition) were presented for practice.  
214 Within each trial, a fixation cross was present at the center of the screen for 500 ms accompanied by  
215 a “beep” sound at the final 75 ms. Afterwards the stimulus was presented for 100 ms in one of the  
216 four quadrants around the center of the screen with a visual angle of 4.67° (viewing distance 60 cm;  
217 center of the images at [+2.4,+2.4] relative to screen center). A dotted mask appeared at the position  
218 of the stimulus for 1900ms directly after the end of stimulus presentation, then followed by the next  
219 trial. The order of stimuli was randomized and stimulus positions were pseudo-randomized with the  
220 same stimulus never occurring twice in a row.

221 A total of nine participants (3 RP, 6AP) had to be excluded. They either misunderstood the  
222 experiment (N=5) or were recognized as outliers during inspection of RT distributions across and  
223 within conditions (N=4).

## 224 **2.4 Statistical Analysis**

225 All statistical analyses were conducted using the open-source statistical software package R (Version  
226 3.5, <https://www.r-project.org/>).

227 First, only reaction times for correctly answered trials in the experiments HL and AGLT were taken.  
228 RT distributions within and across subjects, conditions and groups were inspected. For AGLT,  
229 reaction times were calculated relative to the first possible time point of decision, i.e. 2nd note for  
230 local trials (RT-210ms) and 4th note for global trials (RT-630ms) to make RT’s comparable between  
231 conditions. Trials with physiologically impossible RT’s (i.e.  $\leq 0$ ) or extremely long RT’s ( $>1000$ ms  
232 for HL) were then removed. In a next step, individual outliers defined as exceeding  $\pm 2$  times the  
233 mean absolute deviation from the median of each subject's RT distribution were identified and the  
234 corresponding trials removed. The remaining trials were considered for further statistical group  
235 analysis using median and absolute deviation from median as dependent variables because of non-  
236 normality of the subjects’ individual RT distributions (the distribution of RT medians across subjects  
237 was normal). The process was performed separately for HL and AGLT trials.

238 We expected group differences between AP and RP regarding performance on local versus global  
239 trials and an interaction between congruency and group for both, local and global trials. Three-way  
240 2x2x2 ANOVAs with two within-subjects factors (congruency, hierarchical level) and one between-  
241 subjects factor (group) were performed for each experiment (HL and AGLT) on three dependent  
242 variables each: accuracy (ACC), reaction time medians (RT) and a combined score “Speed-accuracy-

243 composite-score” (SACS). The latter has been successfully used by Bouvet et al. (2014) (Bouvet,  
244 Simard-Meilleur, et al., 2014) for the auditory global-local paradigm, which served as a template for  
245 the present study (AGLT experiment). SACS is calculated as the difference of both scores (ACC (%)  
246 and RT), which are z-standardized across all conditions (congruency, hierarchical level) and  
247 participants (groups). Therefore, SACS quantifies the performance in one score (e.g. ACC) relative to  
248 the other (e.g. RT), so as to deconfound individual strategies - e.g. being fast but not very accurate or  
249 being very accurate at the expense of RT. A range of other studies, especially in the field of  
250 perception research, have made use of SACS and related scores (Austen & Enns, 2003; Collignon et  
251 al., 2010; Glaser, Mendrek, Germain, Lakis, & Lavoie, 2012; Romei, Driver, Schyns, & Thut, 2011).  
252 Additionally we performed 2x2 ANOVAs on SACS separately for local and global conditions of HL  
253 and AGLT, with between-subjects factor “group” and within-subjects factor “congruency”. To  
254 investigate interference effects and their correlation with autistic traits (AQ) and pitch adjustment  
255 accuracy (MAD, SDfOM), we calculated individual scores for global-to-local and local-to-global  
256 interference for RT, ACC and SACS according to (Bouvet et al., 2011)). Global-to-local interference  
257 is calculated as the difference between performance on local congruent minus local incongruent  
258 trials, using RT, ACC or SACS. Similarly, local-to-global interference takes global congruent minus  
259 global incongruent trials. Both measures reflect the degree of interference of the unattended level  
260 (e.g. global) on the rating of the attended level (e.g. local; here: global-to-local interference), which is  
261 exhibited for incongruent trials relative to congruent trials. Pearson’s product moment correlations  
262 were calculated to estimate the relationship between interference effects and autistic traits  
263 respectively absolute pitch performance.

264

## 265 **3 Results**

### 266 **3.1 Auditory processing**

267 Analyses revealed a main effect of hierarchical level for RT,  $F_{RT}(1, 53) = 45.33, p < 1.21e-08,$   
268  $\eta_p^2 = 0.75$ , ( $F_{SACS}(1, 53) = 0.17, p = .69; F_{ACC}(1, 53) = 1.39, p = .24$ ) and a main effect of  
269 congruency for all scores ( $F_{RT}(1, 53) = 34.65, p < 2.74e-07, \eta_p^2 = 0.55; F_{SACS}(1, 53) = 33.30, p$   
270  $< 4.19e-07, \eta_p^2 = 0.30; F_{ACC}(1, 53) = 36.76, p < 1.44e-07, \eta_p^2 = 0.19$ ). Furthermore, there was a  
271 marginally significant main effect of group on RT ( $F_{RT}(1, 53) = 3.33, p = 0.07, \eta_p^2 = 0.54$ ). Significant  
272 interactions for hierarchical level and congruency (see Figure 2) were also found for all scores  
273 ( $F_{RT}(1, 53) = 7.43, p < .009, \eta_p^2 = 0.12; F_{SACS}(1, 53) = 25.27, p < 6.05e-06, \eta_p^2 = 0.32; F_{ACC}(1, 53) =$   
274  $23.31, p < 1.21e-05, \eta_p^2 = 0.31$ ), while a significant interaction of group and congruency was only  
275 found for ACC ( $F_{ACC}(1, 53) = 4.21, p < .04, \eta_p^2 = 0.06$ ) and marginally for SACS ( $F_{SACS}(1, 53) =$   
276  $3.53, p = 0.07, \eta_p^2 = 0.04$ ). There were no three-way interactions. For means and standard deviations  
277 see table 2.

278 The two-way ANOVA within the local condition revealed a main effect of congruency ( $F_{congruency}(1,$   
279  $53) = 55.02, p < 9.61e-10, \eta_p^2 = 0.51$ ) but not of group, nor was there any interaction ( $F_{group}(1, 53) =$   
280  $1.58, p = 0.21, \eta_p^2 = 0.13; F_{congruency \times group}(1, 53) = 1.72, p = 0.19, \eta_p^2 = 0.03$ ). The global condition  
281 yielded no significant main effects or interactions ( $F_{group}(1, 53) = 0.39, p = 0.53, \eta_p^2 = 0.01;$   
282  $F_{congruency}(1, 53) = 0.06, p = 0.81, \eta_p^2 < 0.01; F_{congruency \times group}(1, 53) = 1.13, p = 0.29, \eta_p^2 = 0.02$ ).  
283 Figure 3 shows differences between conditions per group and experiment.

284

## 285 **3.2 Visual processing**

286 Analyses yielded main effects of hierarchical level for all scores ( $F_{RT}(1, 53) = 139.19, p < 2e-16,$   
287  $\eta_p^2 = 0.93, F_{SACS}(1, 53) = 94.85, p < 2.1e-13, \eta_p^2 = 0.93; F_{ACC}(1, 53) = 119.69, p < 3.31e-15,$   
288  $\eta_p^2 = 0.89$ ) and a marginal main effect of congruency for ACC ( $F_{ACC}(1, 53) = 3.76, p = 0.06,$   
289  $\eta_p^2 = 0.04$ ). Significant interactions were found for hierarchical level and congruency (see Figure 2)  
290 on RT ( $F_{RT}(1, 53) = 5.56, p < .02, \eta_p^2 = 0.09$ ), for group and hierarchical level on all scores ( $F_{RT}(1,$   
291  $53) = 9.58, p < .003, \eta_p^2 = 0.49; F_{SACS}(1, 53) = 4.50, p < 0.04, \eta_p^2 = 0.39; F_{ACC}(1, 53) = 6.01, p < .02,$   
292  $\eta_p^2 = 0.28$ ), and marginally for group and congruency on RT ( $F_{RT}(1, 53) = 3.86, p = 0.05, \eta_p^2 =$   
293  $0.05$ ). There were no three-way interactions. For means and standard deviations see table 2. Two-  
294 way ANOVAs yielded a main effect of group ( $F_{group}(1, 53) = 3.98, p = 0.05, \eta_p^2 = 0.44$ ) for the local  
295 condition ( $F_{congruency}(1, 53) = 1.79, p = 0.19, \eta_p^2 < 0.03; F_{congruency \times group}(1, 53) = 0.33, p = 0.57,$   
296  $\eta_p^2 = 0.01$ ) and no effects for the global condition ( $F_{group}(1, 53) = 0.18, p = 0.68, \eta_p^2 = 0.02;$   
297  $F_{congruency}(1, 53) = 0.84, p = 0.36, \eta_p^2 < 0.02; F_{congruency \times group}(1, 53) = 0.62, p = 0.43, \eta_p^2 = 0.01$ ).

## 298 **3.3 Interference effects**

299 In general, higher values for local-to-global interference or vice versa indicate higher interference by  
300 the local (respectively global) level on incongruent trials. As smaller RT's indicate better  
301 performance, RT interference effects are reversed (lower values indicating higher interference).  
302 Analysis of local-to-global interference revealed negative correlations between absolute pitch  
303 performance and RT local-to-global interference for the auditory domain (MAD:  $r = -0.295, p < .05;$   
304  $SDfoM: r = -0.421, p < .001$ ). Therefore higher accuracy on absolute pitch tests (lower values MAD  
305 and SDfoM) is associated with weaker local-to-global interference in audition (see Figure 4). No  
306 local-to-global interference effects were found for the visual domain.

307  
308 In the auditory domain, better performance (pitch template tuning, consistency) on absolute pitch  
309 tests (SDfoM) was furthermore correlated with reduced global-to-local interference in audition  
310 (ACC:  $r = 0.300, p < .05;$  SACS:  $r = 0.242, p = 0.075$ , marginally significant). Higher autistic traits were  
311 associated with marginally lower global-to-local interference in the visual domain ( $r = -0.231,$   
312  $p = 0.090$ ). However, all other correlations remained non-significant (see tables 4 and 5).

## 315 **4 Discussion**

316 The present study is the first to investigate cognitive style, i.e. the tendency to focus more either on  
317 details or on the global shape/context of sensory stimuli, in AP and RP musicians. Taken together,  
318 our results cannot rule out the hypothesis that AP musicians have a more detail-oriented cognitive  
319 style compared to RP, but the evidence is too weak and inconsistent across experiments and  
320 conditions, to explain differences in AP performance based on cognitive style alone.

### 321 **4.1 Pitch perception and cognitive style**

322 Performance on auditory or visual hierarchically-constructed stimuli frequently used to assess  
323 cognitive style (Bouvet et al., 2011; Navon, 1977) did not reveal strong group differences between  
324 AP and RP musicians. As expected, global as well as congruent stimuli revealed a processing  
325 advantage both in terms of speed (RT) as well as accuracy (ACC, SACS) independent of group. In  
326 general, AP and RP were similar in the degree of performance difference between local and global



327 congruent and incongruent trials (three-way interaction). If anything, the groups might differ in  
328 performance on congruent vs. incongruent trials independent of hierarchical level, or vice versa. RT  
329 measures in both audition and vision furthermore showed a tendency for slower responses of AP  
330 independent of experimental conditions, which was especially prevalent in the visual local condition.  
331 Interestingly, groups did not differ in basic information processing speed measured as a confounding  
332 variable by ZVT (“Zahlen-Verbindungs-Test”; Oswald, 2016), so general information processing  
333 ability cannot account for the differences. In summary, while frequent effects of experimental  
334 conditions were independent of groups, there was no consistent tendency towards an advantage for  
335 particular processing levels (local vs. global) for the two groups, which would have been reflected in  
336 three-way interactions.

337 Correlation analysis revealed that lower local-to-global interference (higher interference of local  
338 percept on global performance) is associated with higher accuracy in pitch adjustment test, but only  
339 for RT and only in audition. As we were expecting more detail-oriented perception for AP possessors  
340 (Chin, 2003; Mottron et al., 2012), this result actually stands against our hypothesis, as here RP are  
341 more affected by details in perceiving a global auditory percept. However, this was only present for  
342 RT measures, which alone might not comprise clear evidence in our experiments. Musical stimuli by  
343 their nature unfold over time and participants’ response latencies might differ according to their  
344 listening strategy. For example some individuals may listen to the whole stimulus, before deciding  
345 whether global or local changes were presented, whereas others may choose to press the button as  
346 soon as the crucial 4<sup>th</sup> tone is played (which allows them to notice the difference between global and  
347 local stimuli). In line with our hypothesis, reduced global-to-local interference in audition (ACC,  
348 SACS) is correlated with higher AP accuracy. In vision however, higher autistic traits are associated  
349 with lower global-to-local interference (SACS). Therefore, in audition, people who have a more  
350 accurate AP are less affected by the global shape when concentrating on local details, as are people  
351 with more autistic traits (in the same sample) in vision. However, we have to admit that this is a weak  
352 relationship as it is selective for certain performance measures and sensory domains. In contrast,  
353 prior research has shown that cognitive style is quite similar within subjects across audition and  
354 vision (Bouvet et al., 2011; Justus & List, 2005; Sanders & Poeppel, 2007). A possible explanation  
355 could be that our sample only consists of professional musicians and students at music universities.  
356 This is a highly auditorily trained population, a fact which might increase the likelihood of obtaining  
357 differing effects in audition and vision as well as potential ceiling effects in audition. Further  
358 limitations of our study are the absence of a non-musical control group as well as of a direct  
359 comparison to an autistic sample. In general, inconsistent and weak effects might also be due to  
360 subgroups within AP musicians, whereby not all AP musicians might exhibit heightened autistic  
361 traits and/or a detailed cognitive style. This view receives support from a range of research on AP  
362 showing various influences on the acquisition of the ability, including genetics (Baharloo et al., 1998;  
363 P. K. Gregersen et al., 2013; Peter K. Gregersen et al., 1999, 2001), an early start of musical training  
364 (Baharloo et al., 1998; Bermudez & Zatorre, 2009; Chin, 2003; Gervain et al., 2013; Peter K.  
365 Gregersen et al., 2001), a sensitive period (Saffran, 2003; Saffran & Griepentrog, 2001), musical  
366 education method (Peter K. Gregersen et al., 2001) and nationality or mother tongue (Deutsch,  
367 Dooley, Henthorn, & Head, 2009; Deutsch et al., 2006). However, larger sample sizes are needed to  
368 uncover subgroups in such a heterogeneous population.

#### 369 **4.2 Hierarchical stimuli and cognitive style**

370 Despite the popularity of the weak-central-coherence account (Happé, 1999; Happé & Frith, 2006)  
371 and similar theories of autism (Simon Baron-Cohen, 2009; Mottron et al., 2012, 2006) as well as of  
372 the global-local paradigms (Navon, 1977), a few authors have already raised criticism concerning

373 these hypothetical concepts. First, global-local paradigms in the sense of Navon (Navon, 1977)  
374 exhibit a huge variability of results even in healthy populations. For example, results are highly  
375 affected by relative size and the number of local elements used to construct hierarchical stimuli  
376 (Kimchi & Palmer, 1982). Kimchi (1992) further emphasizes that global-local paradigms using  
377 hierarchically constructed stimuli might not even measure the degree of holistic perception, as being  
378 holistic (i.e. properties that depend on the interrelations between component parts) is not necessarily  
379 the same as involving global precedence (i.e. processing of the higher level preceding that of the  
380 lower one). Therefore, not all global-to-local paradigms might be adequate to measure holistic  
381 perception in terms of Gestalt principles (Wertheimer, 1925). Furthermore, even evidence on a  
382 reduced global precedence effect as a result of a more detail-oriented perception in autism is  
383 contradictory (Mottron et al., 2003; Mottron, Burack, Stauder, & Robaey, 1999; Mottron et al., 2000;  
384 Ozonoff, Strayer, McMahon, & Filloux, 1994).

### 385 **4.3 Future directions**

386 Future studies should therefore address holistic vs. detailed perception using adapted paradigms (e.g.  
387 (Kimchi, 1992; List et al., 2007; Sanders & Poeppel, 2007)) to overcome restrictions of classical  
388 global-to-local paradigms (Navon, 1977). Furthermore, a consideration of neurophysiological or –  
389 anatomical correlates, especially hemispherical contributions, promises to offer a new contribution to  
390 the debate of detail-oriented processing style of AP musicians. Seminal work by Peretz and  
391 colleagues (1987, 1990) on patients with unilateral brain lesions (Peretz, 1990) and healthy non-  
392 musicians (Peretz & Morais, 1987) has shown a processing bias of local information by the left and  
393 global by the right hemisphere. This is especially interesting, as research from both fields, autism and  
394 absolute pitch, often reveals hemispherical associations (e.g. Brancucci et al., 2009; A. Dohn et al.,  
395 2015; Floris et al., 2016; Hyde, Peretz, & Zatorre, 2008; Keenan et al., 2001; Wengenroth et al.,  
396 2014; Wilson, Lusher, Wan, Dudgeon, & Reutens, 2009).

397 To sum up, the correlation analysis of global-to-local interference effects in particular revealed  
398 results in accordance with the hypothesis of a more detailed-oriented cognitive style in AP  
399 possessors, which is also associated with autistic traits within our sample. However, the  
400 inconsistency of the results – and the dissociation of a correlation of AP accuracy with auditory  
401 performance versus autistic traits with visual performance - remains to be understood.

402

403

404

405

406

407

408

409

410

411 **5 Tables**

**Table 1 Participants’ characteristics** Age, nonverbal IQ (SPM), information processing capacity (ZVT), musical training (total hours during life span on main instrument), musicality (AMMA; MSI) and online pitch identification screening (PIS) for each group; \* two RP reported not having absolute pitch but reached a screening score of 13 respectively 21. Because of this and their weak performance in the pitch adjustment test, the subjects were assigned to the RP group; Significant group differences are highlighted in bold. AQ refers to autism spectrum quotient (Simon Baron-Cohen, Wheelwright, Skinner, Martin, & Clubley, 2001), MAD = Mean absolute derivation from standard tone, SDfoM = Standard deviation from own mean deviation.

|                       | AP (n=31) |       |              | RP (n=33) |          |                | t-test                                         |
|-----------------------|-----------|-------|--------------|-----------|----------|----------------|------------------------------------------------|
|                       | Mean      | SD    | Range        | Mean      | SD       | Range          |                                                |
| age                   | 25.13     | 9.2   | 17-58        | 24.0      | 7.02     | 17-57          | t(56.1)=<br>-0.549;<br>p = 0.585               |
| SPM-IQ                | 110.4     | 16.4  | 73-132.25    | 114.41    | 13.14    | 86.5-134.5     | t(57.5)= 1.073;<br>p = 0.288                   |
| ZVT-IQ                | 120.76    | 13.14 | 101.5-145    | 120.61    | 13.69    | 97-143.5       | t(61.9)=<br>-0.045;<br>p = 0.964               |
| hours main instrument | 11961.4   | 9212  | 1642.5-39785 | 13735.61  | 17125.89 | 1606-77617.25  | t(49.7)= 0.520;<br>p = 0.605                   |
| AMMA                  | 64.74     | 6.26  | 53-78        | 63.244    | 7.03     | 46-76          | t(61.8)= -0.90;<br>p = 0.370                   |
| MSI                   | 208.65    | 17.59 | 161-234      | 210.79    | 15.12    | 185-246        | t(59.3)= 0.521;<br>p = 0.604                   |
| <b>PIS</b>            | 28.5      | 6.03  | 15-36        | 5.30      | 4.33     | 0-21*          | <b>t(52.2)=<br/>-17.37;<br/>p &lt; 2.2e-16</b> |
| <b>AQ</b>             | 20.48     | 6.05  | 10-36        | 16.88     | 5.44     | 6-27           | <b>t(60.3)=<br/>-2.501;<br/>p = 0.015</b>      |
| <b>MAD</b>            | 41.37     | 36.49 | 9.8 -200.57  | 296.84    | 86.12    | 91.04 -467.52  | <b>t(43.7)=<br/>15.614;<br/>p &lt; 2.2e-16</b> |
| <b>SDfoM</b>          | 52.31     | 44.96 | 7.41-235.69  | 329.77    | 122.77   | 134.37 -811.73 | <b>t(40.9)=<br/>12.145;<br/>p = 3.788e-15</b>  |
| starting age          | 5.97      | 2.97  | 2-17         | 7.12      | 2.22     | 3-12           | t(55.4)= 1.751;<br>p = 0.086                   |

412

413

414

415

416

**Table 2 Auditory Processing (N=55)** Means (standard deviation) of auditory performance for accuracy (ACC, %), reaction time (RT, ms) and speed-accuracy-composite-score (SACS) by group (absolute pitch, AP, vs. relative pitch, RP).

|             | Global processing |                    | Local processing |                    |
|-------------|-------------------|--------------------|------------------|--------------------|
|             | <i>Congruent</i>  | <i>Incongruent</i> | <i>Congruent</i> | <i>Incongruent</i> |
| <b>RT</b>   |                   |                    |                  |                    |
| <i>AP</i>   | 1.39 (0.14)       | 1.46 (0.17)        | 1.54 (0.17)      | 1.59 (0.22)        |
| <i>RP</i>   | 1.38 (0.10)       | 1.49 (0.18)        | 1.49 (0.13)      | 1.54 (0.16)        |
| <b>ACC</b>  |                   |                    |                  |                    |
| <i>AP</i>   | 35.61 (3.24)      | 35.62 (5.97)       | 36.08 (4.65)     | 31.19 (5.34)       |
| <i>RP</i>   | 34.79 (2.37)      | 34.79 (3.16)       | 37.83 (1.93)     | 31.48 (6.39)       |
| <b>SACS</b> |                   |                    |                  |                    |
| <i>AP</i>   | 0.22 (0.94)       | 0.37 (0.98)        | 0.51 (1.60)      | -0.71 (2.21)       |
| <i>RP</i>   | 0.17 (0.80)       | 0.10 (1.41)        | 1.02 (0.65)      | -0.35 (1.65)       |

417

**Table 3 Visual Processing (N=55)** Means (standard deviation) of visual performance for accuracy (ACC, %), reaction time (RT, ms) and speed-accuracy-composite-score (SACS) by group (absolute pitch, AP, vs. relative pitch, RP).

|             | Global processing |                    | Local processing |                    |
|-------------|-------------------|--------------------|------------------|--------------------|
|             | <i>Congruent</i>  | <i>Incongruent</i> | <i>Congruent</i> | <i>Incongruent</i> |
| <b>RT</b>   |                   |                    |                  |                    |
| <i>AP</i>   | 0.41 (0.05)       | 0.40 (0.05)        | 0.47 (0.06)      | 0.48 (0.06)        |
| <i>RP</i>   | 0.38 (0.05)       | 0.38 (0.04)        | 0.43 (0.06)      | 0.44 (0.06)        |
| <b>ACC</b>  |                   |                    |                  |                    |
| <i>AP</i>   | 37.24 (2.49)      | 37.12 (2.76)       | 30.92 (3.65)     | 30.28 (4.43)       |
| <i>RP</i>   | 37.07 (2.43)      | 36.30 (2.91)       | 30.73 (3.19)     | 30.40 (3.05)       |
| <b>SACS</b> |                   |                    |                  |                    |
| <i>AP</i>   | 0.92 (0.64)       | 0.89 (0.64)        | -0.52 (1.12)     | -0.53 (1.19)       |
| <i>RP</i>   | 1.10 (0.44)       | 1.01 (0.58)        | -0.05 (0.88)     | -0.23 (0.83)       |

418

**Table 4 Local-to-global interference (Gcon-Ginc)** Pearson's product moment correlations and p-values for differences between global congruent (Gcon) and global incongruent (Ginc) trials, separately for reaction time (RT, ms), accuracy (ACC, %) and speed-accuracy-composite-score (SACS). Correlations were calculated with autism traits (AQ) and absolute pitch accuracy (MAD, SdfoM).

|             | AQ              | MAD                   | SdfoM                    |
|-------------|-----------------|-----------------------|--------------------------|
| <b>RT</b>   |                 |                       |                          |
| <i>AGLT</i> | 0.034 (0.806)   | <b>-0.295 (0.029)</b> | <b>-0.421 (&lt;.001)</b> |
| <i>HL</i>   | 0.019 (0.893)   | -0.037 (0.789)        | -0.033 (0.810)           |
| <b>ACC</b>  |                 |                       |                          |
| <i>AGLT</i> | 0.172 (0.210)   | 0.082 (0.550)         | 0.096 (0.486)            |
| <i>HL</i>   | -0.076 (0.583)  | -0.024 (0.860)        | 0.023 (0.869)            |
| <b>SACS</b> |                 |                       |                          |
| <i>AGLT</i> | 0.141 (0.304)   | 0.105 (0.447)         | 0.117 (0.394)            |
| <i>HL</i>   | -0.038 (0.7845) | -0.064 (0.643)        | -0.054 (0.696)           |

419

420

421

**Table 5 Global-to-local interference (Lcon-Linc)** Pearson’s product moment correlations and p-values for differences between global congruent (Lcon) and global incongruent (Linc) trials, separately for reaction time (RT, s), accuracy (ACC, %) and speed-accuracy-composite-score (SACS). Correlations were calculated with autism traits (AQ) and absolute pitch accuracy (MAD, SDfoM).

|             | AQ                    | MAD            | SDfoM                |
|-------------|-----------------------|----------------|----------------------|
| <b>RT</b>   |                       |                |                      |
| AGLT        | 0.202 (0.139)         | 0.030 (0.827)  | -0.006 (0.965)       |
| HL          | 0.171 (0.213)         | -0.013 (0.927) | -0.022 (0.875)       |
| <b>ACC</b>  |                       |                |                      |
| AGLT        | -0.126 (0.359)        | 0.184 (0.178)  | <b>0.300 (0.027)</b> |
| HL          | -0.161 (0.240)        | -0.014 (0.919) | -0.114 (0.409)       |
| <b>SACS</b> |                       |                |                      |
| AGLT        | -0.171 (0.211)        | 0.109 (0.429)  | <b>0.242 (0.075)</b> |
| HL          | <b>-0.231 (0.090)</b> | 0.094 (0.495)  | 0.018 (0.898)        |

422

423 **6 Figures**

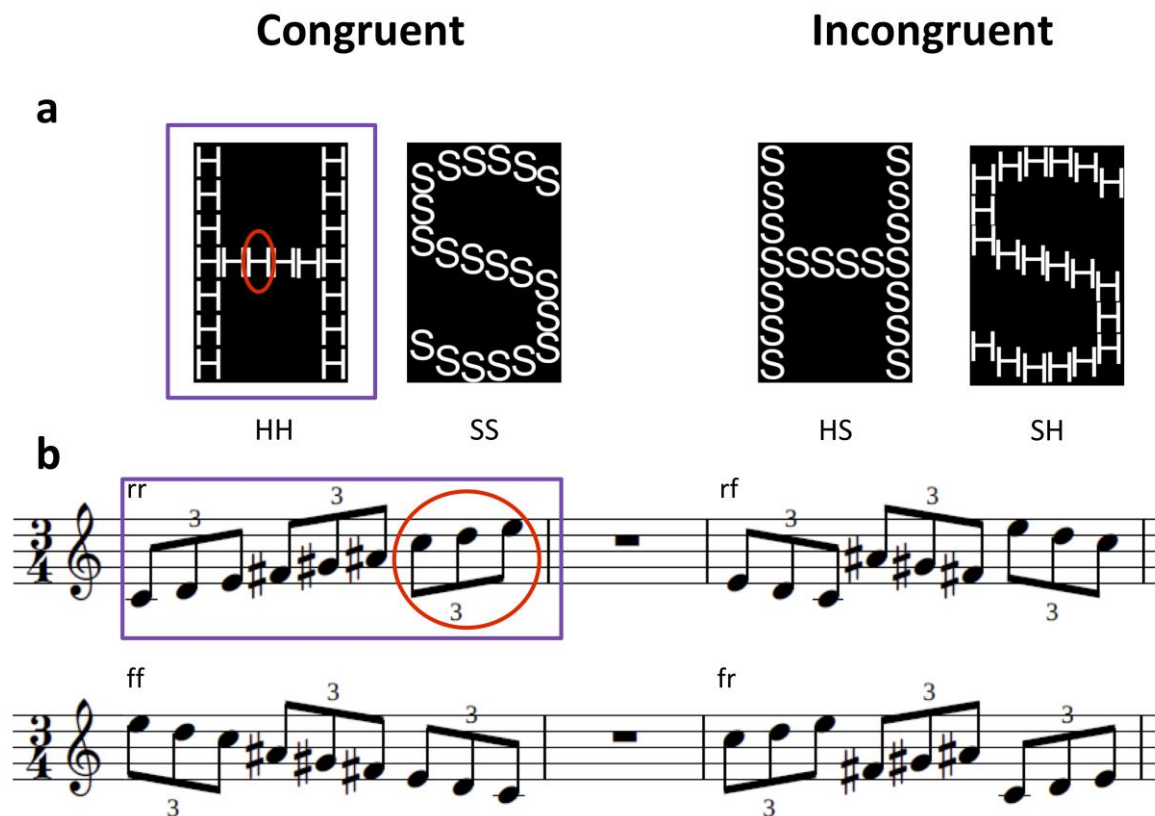

424

425 **Figure 1:** Examples of visual and auditory hierarchical stimuli of the Hierarchical letters (a) and  
 426 Auditory global-local test (b). Experiments are divided into two blocks, in which participants have to  
 427 concentrate either on local elements (red; small letters or tone triplets) or on global shape (purple; big  
 428 letter shape or whole melody). The resulting stimuli can be congruent (e.g. HH: big H, small H; rr=

**Absolute pitch – a focus on details?**

429 rising tones within whole melody and within triplets) or incongruent (e.g. SH: big S, small H; rf=  
430 rising tones within whole melody but falling within triplets). Melodic stimuli occur in different  
431 transpositions across all possible tonalities.

432

**Absolute pitch – a focus on details?**

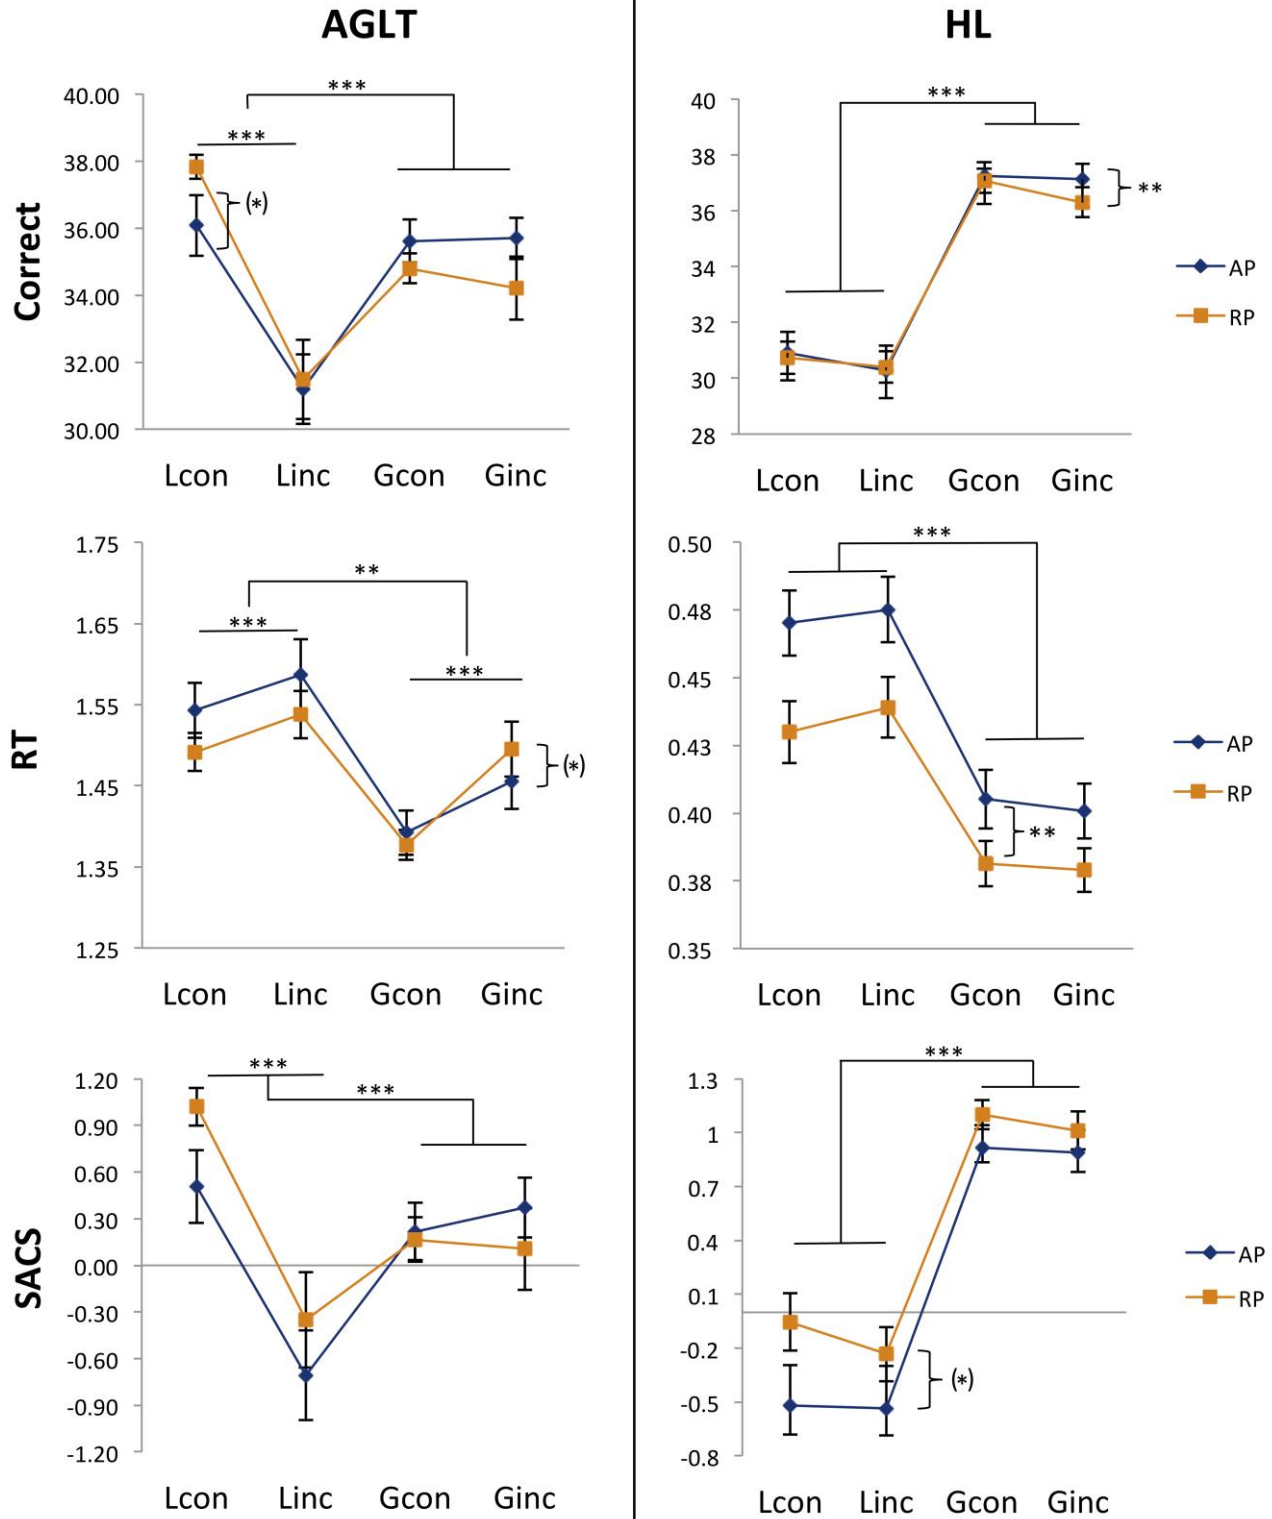

433

434 **Figure 2:** Speed accuracy composite score (SACS), accuracy and RT differences per condition (con=  
 435 congruent, inc = incongruent; L= local, G= global) and group (AP= absolute pitch, RP= relative  
 436 pitch). SACS: higher values indicate better performance. Bars represent standard errors. \* p<.05. \*\*  
 437 p<.01. \*\*\* p<.001, (\*) p<.10.

## Absolute pitch – a focus on details?

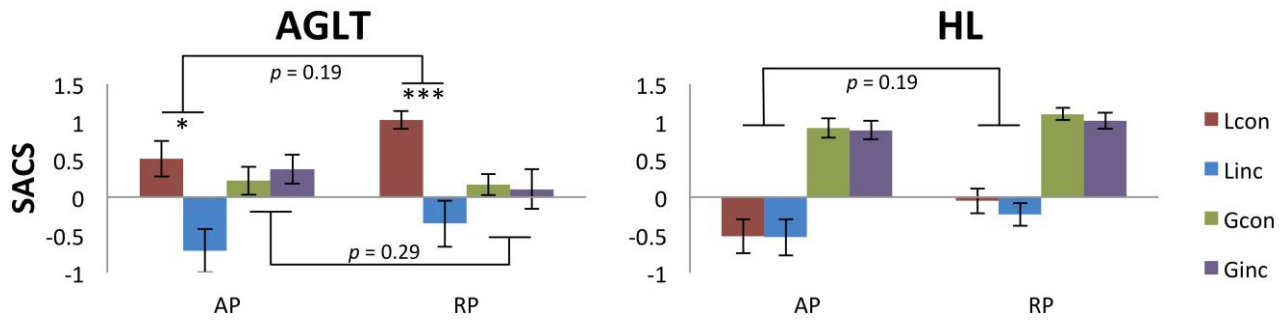

438

439 **Figure 3:** Speed accuracy composite score (SACS) for experimental conditions (hierarchical level,  
440 congruency) by group. Left: auditory processing (AGLT), right: visual processing (HL). Marginal  
441 significant interaction between group and congruency for AGLT did not reach significance within  
442 local vs. global condition. Higher values indicate better performance. HL similarly exhibited a weak  
443 tendency for a different effect of congruency within local condition, but remained non-significant.  
444 Within-group differences for congruency are shown for all hierarchical levels and both experiments.  
445 \*  $p < .05$ , \*\*  $p < .01$ , \*\*\*  $p < .001$  (uncorrected)



## Absolute pitch – a focus on details?

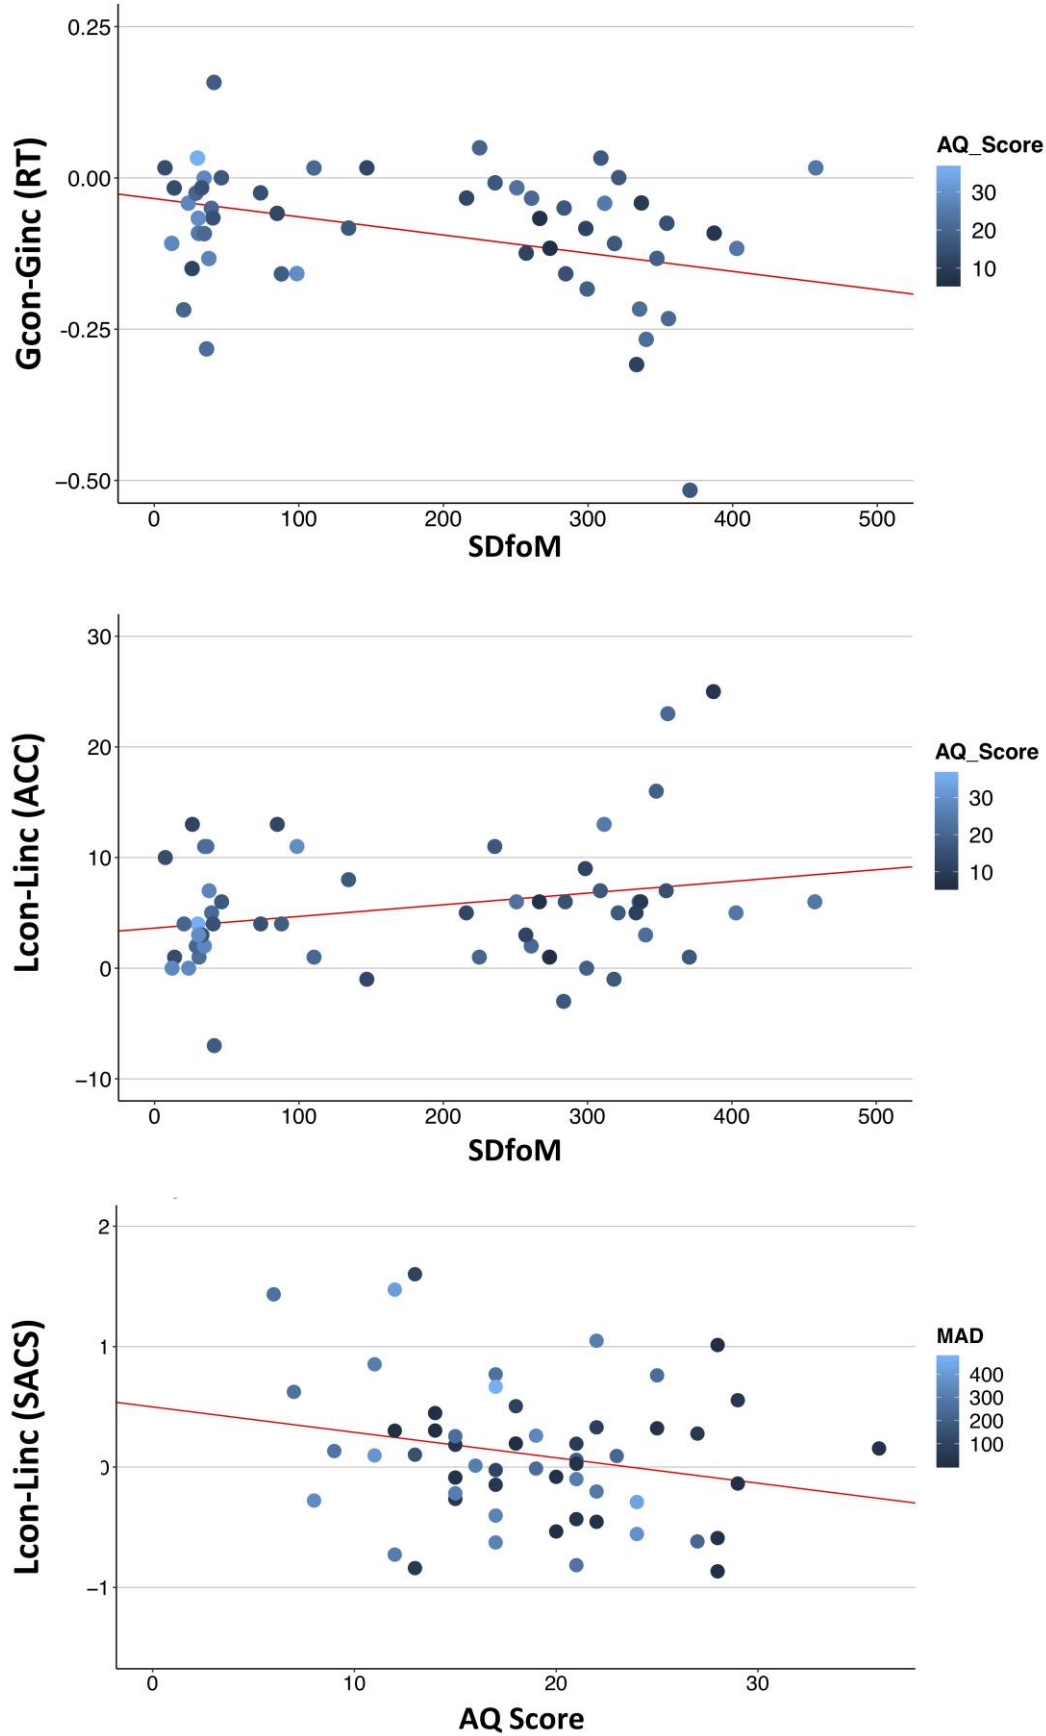

447 **Figure 4:** Correlations of visual and auditory interference with autistic traits and absolute pitch  
448 performance top: auditory local-to-global interference for RT (reaction times) correlates negatively  
449 with standard deviation from target tone in pitch adjustment test; middle: auditory global-to-local  
450 interference for ACC (accuracy) correlates positively with standard deviation from target tone;  
451 bottom: Visual global-to-local interference (SACS,) correlates negatively with autistic traits (AQ-  
452 Score, marginally significant). Higher values for interference (y-axis) indicate higher interference of  
453 the first named level (reverse for RT). Colors indicate values for pitch accuracy (MAD) respectively  
454 autistic traits (AQ). \*  $p < .05$ , \*\* $p < .01$ , \*\*\* $p < .001$  (uncorrected).

## 455 **7 Declarations**

### 456 **7.1 Ethics approval and consent to participate**

457 The study was approved by the ethic committee of the Hanover Medical School (Approval no. 7372,  
458 committee's reference number: DE 9515). All participants gave written consent.

### 459 **7.2 Conflict of Interest**

460 The authors declare that the research was conducted in the absence of any commercial or financial  
461 relationships that could be construed as a potential conflict of interest.

### 462 **7.3 Author Contributions**

463 TW designed the study, collected, analysed and interpreted the data. EA contributed to the design of  
464 the study and interpretation of the data. All authors read, improved and approved the final  
465 manuscript.

### 466 **7.4 Funding**

467 TW receives a PhD scholarship from the German National Academic Foundation; TW declares that  
468 the funding body has no influence on design of the study and collection, analysis or interpretation of  
469 data and in writing the manuscript.

### 470 **7.5 Acknowledgments**

471 We are grateful to Fynn Lautenschläger for support in data collection, Hannes Schmitz, Pablo Carra  
472 and Artur Ehle for programming and technical support, and to Dr. Michael Großbach, Christos  
473 Ioannou PhD, and Dr. Daniel Scholz on fruitful discussion on the topic and support in data evaluation  
474 strategies.

### 475 **7.6 Data Availability Statement**

476 The datasets generated and/ or analyzed during the current study are not publicly available due to  
477 specifications on data availability within the ethics approval. Data are however available from the  
478 corresponding author upon reasonable request and with permission of the ethics committee of the  
479 Hanover Medical School.

480

481

482

483 **8 References**

- 484 Athos, E. A., Levinson, B., Kistler, A., Zemansky, J., Bostrom, A., Freimer, N., & Gitschier, J.  
485 (2007). Dichotomy and perceptual distortions in absolute pitch ability. *Proceedings of the National*  
486 *Academy of Sciences*, 104(37), 14795–14800. <https://doi.org/10.1073/pnas.0703868104>
- 487 Austen, E. L., & Enns, J. T. (2003). Change detection in an attended face depends on the expectation  
488 of the observer. *Journal of Vision*, 3(1), 7. <https://doi.org/10.1167/3.1.7>
- 489 Baharloo, S., Johnston, P. A., Service, S. K., Gitschier, J., & Freimer, N. B. (1998). Absolute Pitch:  
490 An Approach for Identification of Genetic and Nongenetic Components. *The American Journal of*  
491 *Human Genetics*, 62(2), 224–231. <https://doi.org/10.1086/301704>
- 492 Baron-Cohen, S. (2005). Two new theories of autism: hyper-systemising and assortative mating.  
493 *Archives of Disease in Childhood*, 91(1), 2–5. <https://doi.org/10.1136/adc.2005.075846>
- 494 Baron-Cohen, S. (2009). Autism: The Empathizing-Systemizing (E-S) Theory. *Annals of the New*  
495 *York Academy of Sciences*, 1156(1), 68–80. <https://doi.org/10.1111/j.1749-6632.2009.04467.x>
- 496 Baron-Cohen, S., Wheelwright, S., Skinner, R., Martin, J., & Clubley, E. (2001). The Autism-  
497 Spectrum Quotient (AQ): Evidence from Asperger Syndrome/High-Functioning Autism, Males and  
498 Females, Scientists and Mathematicians. *Journal of Autism and Developmental Disorders*, 31(1), 5–  
499 17. <https://doi.org/10.1023/A:1005653411471>
- 500 Bermudez, P., & Zatorre, R. J. (2009). The absolute pitch mind continues to reveal itself. *Journal of*  
501 *Biology*, 8(8), 75. <https://doi.org/10.1186/jbiol171>
- 502 Bölte, S., Holtmann, M., Poustka, F., Scheurich, A., & Schmidt, L. (2007). Gestalt Perception and  
503 Local-Global Processing in High-Functioning Autism. *Journal of Autism and Developmental*  
504 *Disorders*, 37(8), 1493–1504. <https://doi.org/10.1007/s10803-006-0231-x>
- 505 Bonnel, A., Mottron, L., Peretz, I., Trudel, M., Gallun, E., & Bonnel, A. M. (2003). Enhanced Pitch  
506 Sensitivity in Individuals with Autism: A Signal Detection Analysis. *Journal of Cognitive*  
507 *Neuroscience*, 15(2), 226–235. <https://doi.org/10.1162/089892903321208169>
- 508 Bouvet, L., Rousset, S., Valdois, S., & Donnadieu, S. (2011). Global precedence effect in audition  
509 and vision: Evidence for similar cognitive styles across modalities. *Acta Psychologica*, 138(2), 329–  
510 335. <https://doi.org/10.1016/j.actpsy.2011.08.004>
- 511 Bouvet, L., Simard-Meilleur, A.-A., Paignon, A., Mottron, L., & Donnadieu, S. (2014). Auditory  
512 local bias and reduced global interference in autism. *Cognition*, 131(3), 367–372.  
513 <https://doi.org/10.1016/j.cognition.2014.02.006>
- 514 Brancucci, A., di Nuzzo, M., & Tommasi, L. (2009). Opposite hemispheric asymmetries for pitch  
515 identification in absolute pitch and non-absolute pitch musicians. *Neuropsychologia*, 47(13), 2937–  
516 2941. <https://doi.org/10.1016/j.neuropsychologia.2009.06.021>
- 517 Brown, W. A., Cammuso, K., Sachs, H., Winklosky, B., Mullane, J., Bernier, R., ... Folstein, S. E.  
518 (2003). Autism-Related Language, Personality, and Cognition in People with Absolute Pitch: Results

- 519 of a Preliminary Study. *Journal of Autism and Developmental Disorders*, 33(2), 163–167.  
520 <https://doi.org/10.1023/A:1022987309913>
- 521 Chin, C. S. (2003). The Development of Absolute Pitch: A Theory Concerning the Roles of Music  
522 Training at an Early Developmental Age and Individual Cognitive Style. *Psychology of Music*, 31(2),  
523 155–171. <https://doi.org/10.1177/0305735603031002292>
- 524 Collignon, O., Girard, S., Gosselin, F., Saint-Amour, D., Lepore, F., & Lassonde, M. (2010). Women  
525 process multisensory emotion expressions more efficiently than men. *Neuropsychologia*, 48(1), 220–  
526 225. <https://doi.org/10.1016/j.neuropsychologia.2009.09.007>
- 527 Costa-Giomi, E., Gilmour, R., Siddell, J., & Lefebvre, E. (2006). Absolute Pitch, Early Musical  
528 Instruction, and Spatial Abilities. *Annals of the New York Academy of Sciences*, 930(1), 394–396.  
529 <https://doi.org/10.1111/j.1749-6632.2001.tb05750.x>
- 530 Deutsch, D., & Dooley, K. (2013). Absolute pitch is associated with a large auditory digit span: A  
531 clue to its genesis. *The Journal of the Acoustical Society of America*, 133(4), 1859.  
532 <https://doi.org/10.1121/1.4792217>
- 533 Deutsch, D., Dooley, K., Henthorn, T., & Head, B. (2009). Absolute pitch among students in an  
534 American music conservatory: Association with tone language fluency. *The Journal of the Acoustical*  
535 *Society of America*, 125(4), 2398–2403. <https://doi.org/10.1121/1.3081389>
- 536 Deutsch, D., Henthorn, T., Marvin, E., & Xu, H. (2006). Absolute pitch among American and  
537 Chinese conservatory students: Prevalence differences, and evidence for a speech-related critical  
538 perioda). *The Journal of the Acoustical Society of America*, 119(2), 719–722.  
539 <https://doi.org/10.1121/1.2151799>
- 540 Dohn, A., Garza-Villarreal, E. A., Chakravarty, M. M., Hansen, M., Lerch, J. P., & Vuust, P. (2015).  
541 Gray- and White-Matter Anatomy of Absolute Pitch Possessors. *Cerebral Cortex*, 25(5), 1379–1388.  
542 <https://doi.org/10.1093/cercor/bht334>
- 543 Dohn, A., Garza-Villarreal, E. A., Heaton, P., & Vuust, P. (2012). Do musicians with perfect pitch  
544 have more autism traits than musicians without perfect pitch? *PLoS One*, 7.
- 545 Dohn, A., Garza-Villarreal, E. A., Ribe, L. R., Wallentin, M., & Vuust, P. (2014). Musical Activity  
546 Tunes Up Absolute Pitch Ability. *Music Perception: An Interdisciplinary Journal*, 31(4), 359–371.  
547 <https://doi.org/10.1525/mp.2014.31.4.359>
- 548 Floris, D. L., Barber, A. D., Nebel, M. B., Martinelli, M., Lai, M.-C., Crocetti, D., ... Mostofsky, S.  
549 H. (2016). Atypical lateralization of motor circuit functional connectivity in children with autism is  
550 associated with motor deficits. *Molecular Autism*, 7(1). <https://doi.org/10.1186/s13229-016-0096-6>
- 551 Foxtton, J. M., Stewart, M. E., Barnard, L., Rodgers, J., Young, A. H., O'Brien, G., & Griffiths, T. D.  
552 (2003). Absence of auditory “global interference” in autism. *Brain: A Journal of Neurology*, 126(Pt  
553 12), 2703–2709. <https://doi.org/10.1093/brain/awg274>
- 554 Gervain, J., Vines, B. W., Chen, L. M., Seo, R. J., Hensch, T. K., Werker, J. F., & Young, A. H.  
555 (2013). Valproate reopens critical-period learning of absolute pitch. *Frontiers in Systems*  
556 *Neuroscience*, 7. <https://doi.org/10.3389/fnsys.2013.00102>

- 557 Glaser, E., Mendrek, A., Germain, M., Lakis, N., & Lavoie, M. E. (2012). Sex differences in memory  
558 of emotional images: A behavioral and electrophysiological investigation. *International Journal of*  
559 *Psychophysiology*, 85(1), 17–26. <https://doi.org/10.1016/j.ijpsycho.2012.01.007>
- 560 Gordon, E. E. (1989). *Manual for the advanced measures of music audiation*. GIA Publications.
- 561 Gregersen, P. K., Kowalsky, E., Kohn, N., & Marvin, E. W. (1999). Absolute Pitch: Prevalence,  
562 Ethnic Variation, and Estimation of the Genetic Component. *The American Journal of Human*  
563 *Genetics*, 65(3), 911–913. <https://doi.org/10.1086/302541>
- 564 Gregersen, P. K., Kowalsky, E., Kohn, N., & Marvin, E. W. (2001). Early childhood music education  
565 and predisposition to absolute pitch: Teasing apart genes and environment. *American Journal of*  
566 *Medical Genetics*, 98(3), 280–282. [https://doi.org/10.1002/1096-8628\(20010122\)98:3<280::AID-](https://doi.org/10.1002/1096-8628(20010122)98:3<280::AID-AJMG1083>3.0.CO;2-6)  
567 *AJMG1083>3.0.CO;2-6*
- 568 Gregersen, P. K., Kowalsky, E., Lee, A., Baron-Cohen, S., Fisher, S. E., Asher, J. E., ... Li, W.  
569 (2013). Absolute pitch exhibits phenotypic and genetic overlap with synesthesia. *Human Molecular*  
570 *Genetics*, 22(10), 2097–2104. <https://doi.org/10.1093/hmg/ddt059>
- 571 Grice, S. J., Spratling, M. W., Karmiloff-Smith, A., Halit, H., Csibra, G., de Haan, M., & Johnson,  
572 M. H. (2001). Disordered visual processing and oscillatory brain activity in autism and Williams  
573 Syndrome. *NeuroReport*, 12(12), 2697.
- 574 Happé, F. (1999). Autism: cognitive deficit or cognitive style? *Trends Cogn Sci*, 3.
- 575 Happé, F., & Frith, U. (2006). The weak coherence account: detail-focused cognitive style in autism  
576 spectrum disorders. *J Autism Dev Disord*, 36.
- 577 Heaton, P., Davis, R. E., & Happé, F. G. E. (2008). Research note: Exceptional absolute pitch  
578 perception for spoken words in an able adult with autism. *Neuropsychologia*, 46(7), 2095–2098.  
579 <https://doi.org/10.1016/j.neuropsychologia.2008.02.006>
- 580 Heaton, P., Hermelin, B., & Pring, L. (1998). Autism and Pitch Processing: A Precursor for Savant  
581 Musical Ability? *Music Perception: An Interdisciplinary Journal*, 15(3), 291–305.  
582 <https://doi.org/10.2307/40285769>
- 583 Heaton, P., Williams, K., Cummins, O., & Happé, F. (2008). Autism and pitch processing splinter  
584 skills: a group and subgroup analysis. *Autism*, 12.
- 585 Hyde, K. L., Peretz, I., & Zatorre, R. J. (2008). Evidence for the role of the right auditory cortex in  
586 fine pitch resolution. *Neuropsychologia*, 46(2), 632–639.  
587 <https://doi.org/10.1016/j.neuropsychologia.2007.09.004>
- 588 Jäncke, L., Langer, N., & Hänggi, J. (2012). Diminished Whole-brain but Enhanced Peri-sylvian  
589 Connectivity in Absolute Pitch Musicians. *Journal of Cognitive Neuroscience*, 24(6), 1447–1461.  
590 [https://doi.org/10.1162/jocn\\_a\\_00227](https://doi.org/10.1162/jocn_a_00227)
- 591 Justus, T., & List, A. (2005). Auditory attention to frequency and time: an analogy to visual local–  
592 global stimuli. *Cognition*, 98(1), 31–51. <https://doi.org/10.1016/j.cognition.2004.11.001>

- 593 Keenan, J. P., Thangaraj, V., Halpern, A. R., & Schlaug, G. (2001). Absolute Pitch and Planum  
594 Temporale. *NeuroImage*, 14(6), 1402–1408. <https://doi.org/10.1006/nimg.2001.0925>
- 595 Kimchi, R. (1992). Primacy of wholistic processing and global/local paradigm: A critical review.  
596 *Psychological Bulletin*, 112(1), 24–38. <https://doi.org/10.1037/0033-2909.112.1.24>
- 597 Kimchi, R., & Palmer, S. E. (1982). Form and texture in hierarchically constructed patterns. *Journal*  
598 *of Experimental Psychology: Human Perception and Performance*, 8(4), 521–535.  
599 <https://doi.org/10.1037/0096-1523.8.4.521>
- 600 Lai, M.-C., Lombardo, M. V., Chakrabarti, B., & Baron-Cohen, S. (2013). Subgrouping the Autism  
601 “Spectrum”: Reflections on DSM-5. *PLoS Biology*, 11(4), e1001544.  
602 <https://doi.org/10.1371/journal.pbio.1001544>
- 603 List, A., Justus, T., Robertson, L. C., & Bentin, S. (2007). A mismatch negativity study of local–  
604 global auditory processing. *Brain Research*, 1153, 122–133.  
605 <https://doi.org/10.1016/j.brainres.2007.03.040>
- 606 Loui, P., Li, H. C., Hohmann, A., & Schlaug, G. (2011). Enhanced Cortical Connectivity in Absolute  
607 Pitch Musicians: A Model for Local Hyperconnectivity. *Journal of Cognitive Neuroscience*, 23(4),  
608 1015–1026. <https://doi.org/10.1162/jocn.2010.21500>
- 609 Loui, P., Zamm, A., & Schlaug, G. (2012a). Absolute Pitch and Synesthesia: Two Sides of the Same  
610 Coin? Shared and Distinct Neural Substrates of Music Listening. *ICMPC : Proceedings / Edited by*  
611 *Catherine Stevens ... [et Al.]. International Conference on Music Perception and Cognition*, 618–  
612 623.
- 613 Mottron, L., Bouvet, L., Bonnel, A., Samson, F., Burack, J. A., Dawson, M., & Heaton, P. (2012).  
614 Veridical mapping in the development of exceptional autistic abilities. *Neurosci Biobehav Rev*, 37.
- 615 Mottron, L., Burack, J. A., Iarocci, G., Belleville, S., & Enns, J. T. (2003). Locally oriented  
616 perception with intact global processing among adolescents with high-functioning autism: evidence  
617 from multiple paradigms. *J Child Psychol Psychiatry*, 44.
- 618 Mottron, L., Burack, J. A., Stauder, J. E. A., & Robaey, P. (1999). Perceptual Processing among  
619 High-functioning Persons with Autism. *The Journal of Child Psychology and Psychiatry and Allied*  
620 *Disciplines*, 40(2), 203–211.
- 621 Mottron, L., Dawson, M., & Soulières, I. (2009). Enhanced perception in savant syndrome: patterns,  
622 structure and creativity. *Philosophical Transactions of the Royal Society B: Biological Sciences*,  
623 364(1522), 1385–1391. <https://doi.org/10.1098/rstb.2008.0333>
- 624 Mottron, L., Dawson, M., Soulières, I., Hubert, B., & Burack, J. (2006). Enhanced Perceptual  
625 Functioning in Autism: An Update, and Eight Principles of Autistic Perception. *Journal of Autism*  
626 *and Developmental Disorders*, 36(1), 27–43. <https://doi.org/10.1007/s10803-005-0040-7>
- 627 Mottron, L., Peretz, I., & Menard, E. (2000). Local and Global Processing of Music in High-  
628 functioning Persons with Autism: Beyond Central Coherence? *Journal of Child Psychology and*  
629 *Psychiatry*, 41(8), 1057–1065. <https://doi.org/10.1111/1469-7610.00693>

- 630 Müllensiefen, D., Gingras, B., Musil, J., & Stewart, L. (2014). The Musicality of Non-Musicians: An  
631 Index for Assessing Musical Sophistication in the General Population. *PLOS ONE*, *9*(2), e89642.  
632 <https://doi.org/10.1371/journal.pone.0089642>
- 633 Navon, D. (1977). Forest before trees: The precedence of global features in visual perception.  
634 *Cognitive Psychology*, *9*(3), 353–383. [https://doi.org/10.1016/0010-0285\(77\)90012-3](https://doi.org/10.1016/0010-0285(77)90012-3)
- 635 Oldfield, R. C. (1971). The assessment and analysis of handedness: The Edinburgh inventory.  
636 *Neuropsychologia*, *9*(1), 97–113. [https://doi.org/10.1016/0028-3932\(71\)90067-4](https://doi.org/10.1016/0028-3932(71)90067-4)
- 637 Oswald, W. D. (2016). *Zahlen-Verbindungs-Test (ZVT) - 3., überarbeitete und neu normierte Auflage.*  
638 (3rd ed.). Göttingen: Hogrefe.
- 639 Ozonoff, S., Strayer, D. L., McMahon, W. M., & Filloux, F. (1994). Executive Function Abilities in  
640 Autism and Tourette Syndrome: An Information Processing Approach. *Journal of Child Psychology*  
641 *and Psychiatry*, *35*(6), 1015–1032. <https://doi.org/10.1111/j.1469-7610.1994.tb01807.x>
- 642 Peretz, I. (1990). Processing of local and global musical information by unilateral brain-damaged  
643 patients. *Brain: A Journal of Neurology*, *113* ( Pt 4), 1185–1205.
- 644 Peretz, I., & Morais, J. (1987). Analytic processing in the classification of melodies as same or  
645 different. *Neuropsychologia*, *25*(4), 645–652.
- 646 Poirel, N., Mellet, E., Houdé, O., & Pineau, A. (2008). First came the trees, then the forest:  
647 developmental changes during childhood in the processing of visual local–global patterns according  
648 to the meaningfulness of the stimuli. *Dev Psychol*, *44*.
- 649 Poirel, N., Simon, G., Cassotti, M., Leroux, G., Perchey, G., Lanoë, C., ... Houdé, O. (2011). The  
650 shift from local to global visual processing in 6-year-old children is associated with grey matter loss.  
651 *PLoS One*, *6*.
- 652 Pring, L., Ryder, N., Crane, L., & Hermelin, B. (2010). Local and global processing in savant artists  
653 with autism. *Perception*, *39*(8), 1094–1103. <https://doi.org/10.1068/p6674>
- 654 Profita, J., Bidder, T. G., Optiz, J. M., & Reynolds, J. F. (1988). Perfect pitch. *American Journal of*  
655 *Medical Genetics*, *29*(4), 763–771. <https://doi.org/10.1002/ajmg.1320290405>
- 656 Raven, J., Raven, J. C., & Court, J. H. (2004). *Manual for Raven's Progressive Matrices and*  
657 *Vocabulary Tests. Section 3: Standard Progressive Matrices: 2000 Edition, updated 2004.* San  
658 Antonio: Pearson Assessment.
- 659 Romei, V., Driver, J., Schyns, P. G., & Thut, G. (2011). Rhythmic TMS over Parietal Cortex Links  
660 Distinct Brain Frequencies to Global versus Local Visual Processing. *Current Biology*, *21*(4), 334–  
661 337. <https://doi.org/10.1016/j.cub.2011.01.035>
- 662 Russell-Smith, S. N., Maybery, M. T., Bayliss, D. M., & Sng, A. A. (2012). Support for a link  
663 between the local processing bias and social deficits in autism: an investigation of embedded figures  
664 test performance in non-clinical individuals. *J Autism Dev Disord*, *42*.

- 665 Russo, F. A., Windell, D. L., & Cuddy, L. L. (2003). Learning the “Special Note”: Evidence for a  
666 Critical Period for Absolute Pitch Acquisition. *Music Perception*, *21*(1), 119–127.  
667 <https://doi.org/10.1525/mp.2003.21.1.119>
- 668 Saffran, J. R. (2003). Absolute pitch in infancy and adulthood: the role of tonal structure.  
669 *Developmental Science*, *6*(1), 35–43. <https://doi.org/10.1111/1467-7687.00250>
- 670 Saffran, J. R., & Griepentrog, G. J. (2001). Absolute pitch in infant auditory learning: Evidence for  
671 developmental reorganization. *Developmental Psychology*, *37*(1), 74–85.  
672 <https://doi.org/10.1037/0012-1649.37.1.74>
- 673 Sanders, L. D., & Poeppel, D. (2007). Local and global auditory processing: Behavioral and ERP  
674 evidence. *Neuropsychologia*, *45*(6), 1172–1186.  
675 <https://doi.org/10.1016/j.neuropsychologia.2006.10.010>
- 676 Schellenberg, E. G., & Trehub, S. E. (2003). Good Pitch Memory Is Widespread. *Psychological  
677 Science*, *14*(3), 262–266. <https://doi.org/10.1111/1467-9280.03432>
- 678 Takeuchi, A. H., & Hulse, S. H. (1993). Absolute pitch. *Psychological Bulletin*, *113*(2), 345–361.  
679 <https://doi.org/10.1037/0033-2909.113.2.345>
- 680 Ward, W. D. (1999). Absolute pitch. In D. Deutsch (Ed.), *The Psychology of Music* (2nd ed., pp.  
681 265–298). San Diego: Academic Press.
- 682 Wengenroth, M., Blatow, M., Heinecke, A., Reinhardt, J., Stippich, C., Hofmann, E., & Schneider, P.  
683 (2014). Increased Volume and Function of Right Auditory Cortex as a Marker for Absolute Pitch.  
684 *Cerebral Cortex*, *24*(5), 1127–1137. <https://doi.org/10.1093/cercor/bhs391>
- 685 Wertheimer, M. (1925). Drei Abhandlungen Zur Gestalttheorie. *Annalen Der Philosophie Und  
686 Philosophischen Kritik*, *5*(3), 87–87.
- 687 Wilson, S. J., Lusher, D., Wan, C. Y., Dudgeon, P., & Reutens, D. C. (2009). The Neurocognitive  
688 Components of Pitch Processing: Insights from Absolute Pitch. *Cerebral Cortex*, *19*(3), 724–732.  
689 <https://doi.org/10.1093/cercor/bhn121>
- 690 Zatorre, R. J. (2003). Absolute pitch: a model for understanding the influence of genes and  
691 development on neural and cognitive function. *Nature Neuroscience*, *6*(7), 692–695.  
692 <https://doi.org/10.1038/nn1085>
- 693 Ziv, N., & Radin, S. (2014). Absolute and relative pitch: Global versus local processing of chords.  
694 *Advances in Cognitive Psychology*, *10*(1), 15–25. <https://doi.org/10.2478/v10053-008-0152-7>
- 695
